# Supplementary material
Source: PubMed Central journal article supplement (PMC3975575)
Supplement: NIHMS57888-supplement-supplementary_materials.pdf [file NIHMS57888-supplement-supplementary_materials.pdf]

**Neuron, Volume 71**

**Supplemental Information**

**Perceptual Classification**

**in a Rapidly Changing Environment**

**Christopher Summerfield, Timothy E. Behrens, and Etienne Koechlin**

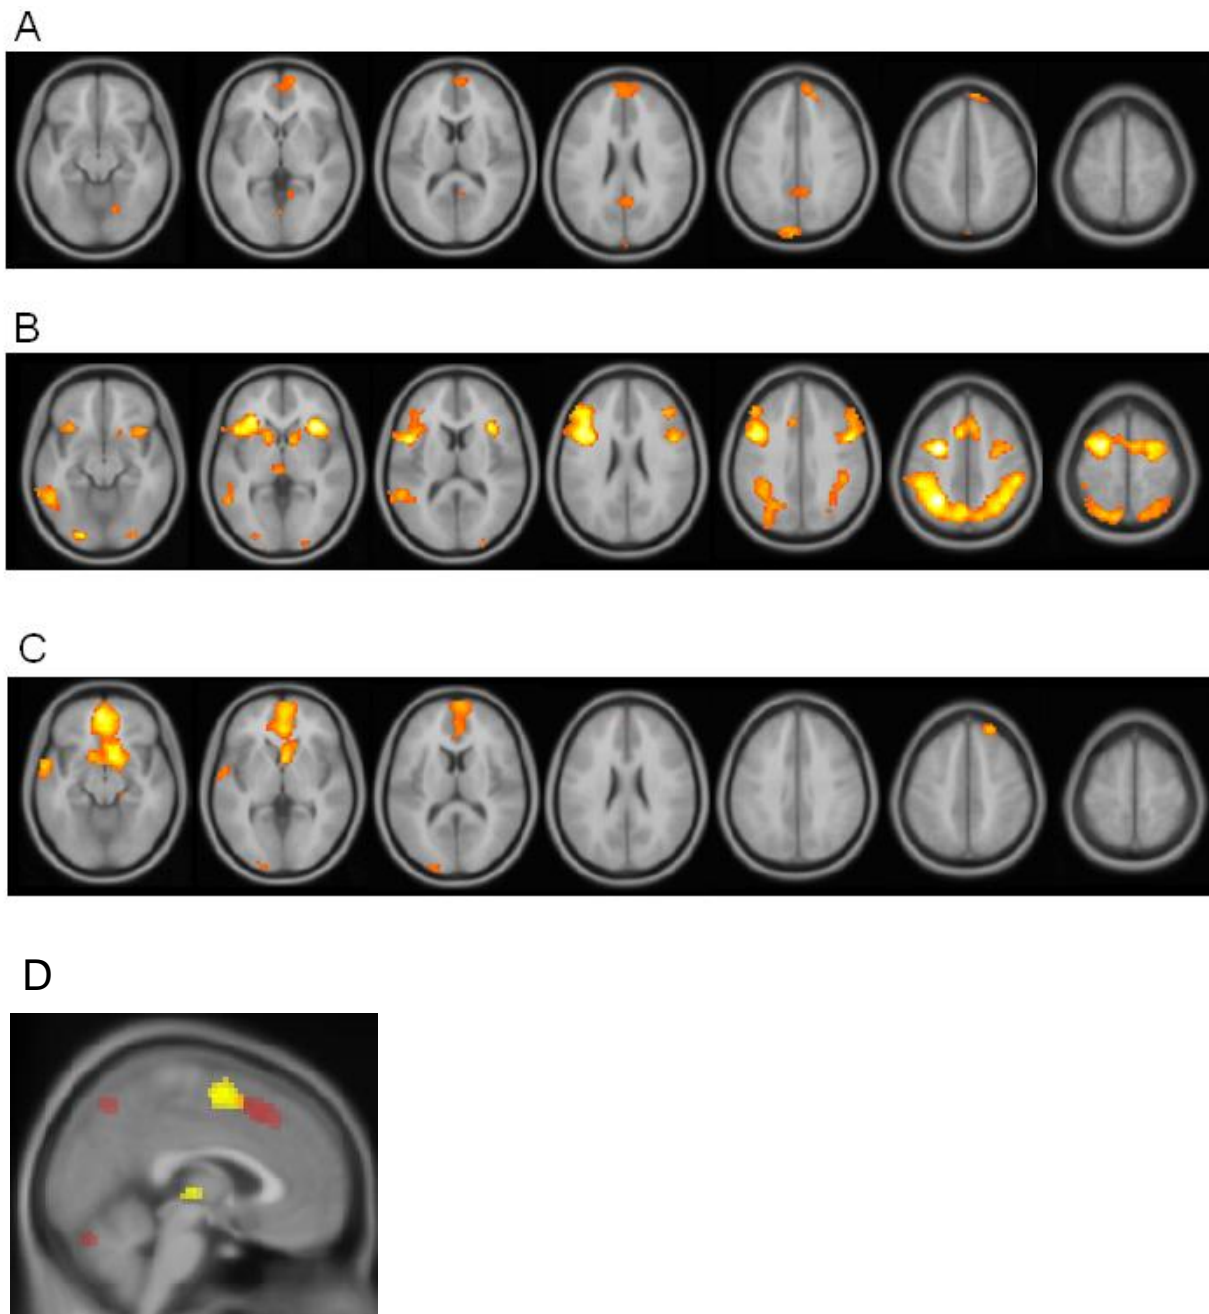

**Figure S1.**

(A) Voxels responding to expected value across all three models (contrast [1 1 1]) (z coordinate of slices, left-right: -12,0,12,24,36,48,60).

(B) Voxels responding to decision entropy across all three models.

(C) Voxels responding to the main effect of reward (correct > incorrect), at the time of feedback. In A, B and C, voxels are rendered onto a template brain at a threshold of  $p < 0.001$  uncorrected.

(D) Juxtaposition of voxels responding to decision entropy predicted by the Bayesian (yellow voxels) and WM (red voxels) models, rendered onto a sagittal slice of a template brain.

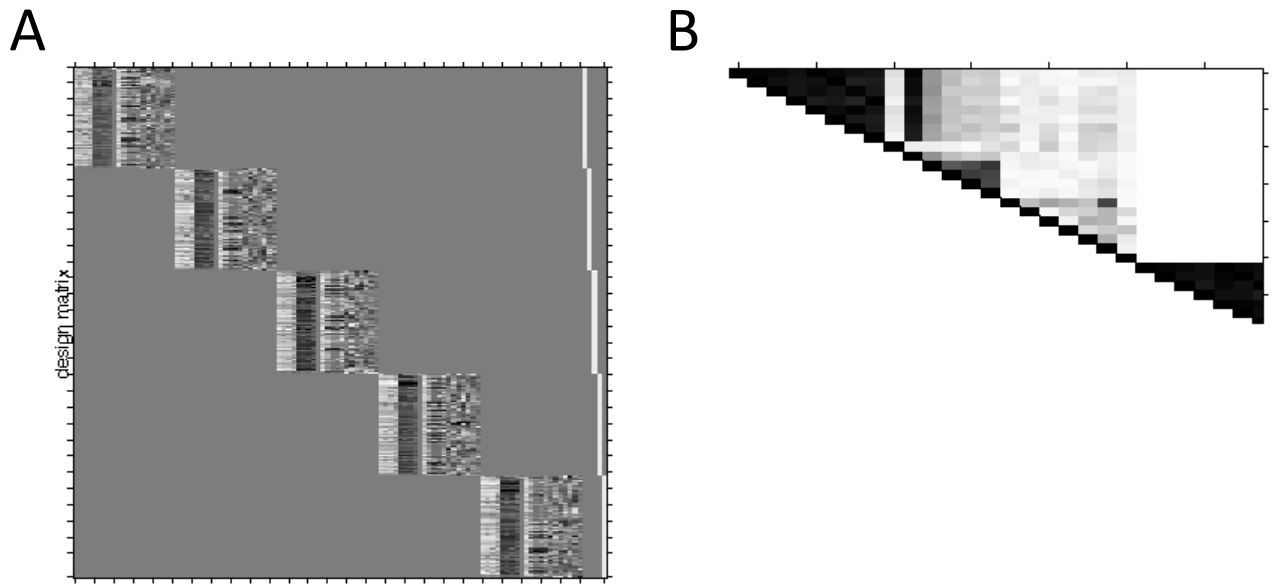

**Figure S2.**

(A) Design matrix for a representative subject (subject 1). 21 regressors per session were entered per session ( $n = 5$ ). These regressors included the main effect of stimulation (1), the interaction between stimulation and choice probability under the Bayesian, QL and working memory models (2-4), the main effect of volatility (5), the interaction between stimulation, volatility and choice probability (6-8), the first trial of the experiment (9), the main effect of the feedback tone (10), correct feedback signals (11), prediction error signals for the the Bayesian, QL and working memory models (12-14), the main effect of the signal outside of the brain (15), and realignment parameters (16-21).

(B) The correlation matrix for the 110 regressors (including 5 extra regressors encoding the main effects of session).

**Table S1a. Voxels Correlating with Expected Reward for the Bayesian Model**

| cluster<br>p(cor) | cluster<br>equivk | cluster<br>p(unc) | voxel<br>p(FWE) | voxel<br>p(FDR) | voxel<br>T | voxel<br>equivZ | voxel<br>p(unc) | x,y,z {mm} | Region |
|-------------------|-------------------|-------------------|-----------------|-----------------|------------|-----------------|-----------------|------------|--------|
| 0.000             | 164               | 0.000             | 0.071           | 0.038           | 6.66       | 4.73            | 0.000           | 18 33 60   | SFG    |
|                   |                   |                   | 0.471           | 0.106           | 5.34       | 4.12            | 0.000           | 24 36 54   | SFG    |
|                   |                   |                   | 0.950           | 0.204           | 4.40       | 3.61            | 0.000           | 21 39 42   | SFG    |
| 0.479             | 23                | 0.060             | 0.993           | 0.210           | 4.08       | 3.42            | 0.000           | 6 -60 12   | PCC    |
|                   |                   |                   | 0.999           | 0.210           | 3.83       | 3.26            | 0.001           | 9 -51 9    | PCC    |

Voxels correlating with expected reward predicted by the Bayesian model at a threshold of  $p < 0.001$  uncorrected, cluster threshold 20 voxels. Abbreviations: SFG, superior frontal gyrus; PCC, posterior cingulate cortex.

Column headings for this and succeeding tables are as follows:

*Cluster p(cor)*: clusterwise p-value, corrected for multiple comparisons; *cluster equivk*: number of voxels in cluster; *cluster p(unc)*, uncorrected clusterwise p-value; *voxel p(FWE)*: voxelwise p-value, corrected for multiple comparisons with familywise error method; *voxel p(FDR)*: voxelwise p-value, corrected for multiple comparisons with false discovery rate method; *voxel T*: voxelwise t-value; *voxel equivz*: voxelwise z-score; *voxel p(unc)*: voxelwise p-value, uncorrected; *x,y,z {mm}*: x y and z coordinates of peak activated voxel in the standardised space of the template brain of the Montreal Neurological Institute; *Region*: approximate brain region, defined by Talairach Demon.

**Table S1b. Voxels Correlating with Expected Reward for the Q-Learning Model**

| cluster<br>p(cor) | cluster<br>equivk | cluster<br>p(unc) | voxel<br>p(FWE) | voxel<br>p(FDR) | voxel<br>T | voxel<br>equivZ | voxel<br>p(unc) | x,y,z {mm} | region |
|-------------------|-------------------|-------------------|-----------------|-----------------|------------|-----------------|-----------------|------------|--------|
| None > 20 voxels  |                   |                   |                 |                 |            |                 |                 |            |        |

Voxels correlating with expected reward predicted by the Q-learning model at a threshold of  $p < 0.001$  uncorrected, cluster threshold 20 voxels. For column headings see table 1a.

**Table S1c. Voxels Correlating with Expected Reward for the Working Memory Model**

| cluster<br>p(cor) | cluster<br>equivk | cluster<br>p(unc) | voxel<br>p(FWE) | voxel<br>p(FDR) | voxel<br>T | voxel<br>equivZ | voxel<br>p(unc) | x,y,z {mm}            | region                       |
|-------------------|-------------------|-------------------|-----------------|-----------------|------------|-----------------|-----------------|-----------------------|------------------------------|
| 0.000             | 958               | 0.000             | 0.000           | 0.000           | 11.19      | 6.14            | 0.000           | 12 -42 36*            | PCC                          |
|                   |                   |                   | 0.000           | 0.000           | 9.55       | 5.72            | 0.000           | 15 -51 30*            | PCC                          |
|                   |                   |                   | 0.005           | 0.000           | 8.05       | 5.25            | 0.000           | -9 -48 33*            | PCC                          |
| 0.000             | 189               | 0.000             | 0.003           | 0.000           | 8.37       | 5.35            | 0.000           | 30 -24 -21            | right PHG                    |
|                   |                   |                   | 0.616           | 0.002           | 5.08       | 3.99            | 0.000           | 30 -36 -15            | right PHG                    |
| 0.000             | 1202              | 0.000             | 0.007           | 0.000           | 7.87       | 5.19            | 0.000           | 6 45 -18*             | vmPFC                        |
|                   |                   |                   | 0.008           | 0.000           | 7.82       | 5.17            | 0.000           | -9 54 -9*             | vmPFC                        |
|                   |                   |                   | 0.016           | 0.000           | 7.43       | 5.03            | 0.000           | 0 39 -9*vmPFC         |                              |
| 0.000             | 161               | 0.000             | 0.134           | 0.001           | 6.23       | 4.55            | 0.000           | 60 -12 -6             | right MTG                    |
|                   |                   |                   | 0.880           | 0.005           | 4.60       | 3.73            | 0.000           | 57 -3 -24             | right MTG                    |
|                   |                   |                   | 0.918           | 0.006           | 4.50       | 3.67            | 0.000           | 54 -9 -18             | right MTG                    |
| 0.000             | 320               | 0.000             | 0.380           | 0.001           | 5.50       | 4.20            | 0.000           | -60 -36 6left MTG     |                              |
|                   |                   |                   | 0.617           | 0.002           | 5.08       | 3.99            | 0.000           | -69 -24 12            | left MTG                     |
|                   |                   |                   | 0.640           | 0.002           | 5.04       | 3.97            | 0.000           | -51 -33 9left MTG     |                              |
| 0.363             | 28                | 0.043             | 0.412           | 0.001           | 5.44       | 4.17            | 0.000           | 0 15 -9               | subgenual cingulate (BA25)   |
| 0.156             | 42                | 0.016             | 0.711           | 0.003           | 4.93       | 3.91            | 0.000           | 30 -18 6right putamen |                              |
|                   |                   |                   | 0.999           | 0.013           | 3.85       | 3.27            | 0.001           | 39 -3 3               | right putamen                |
| 0.081             | 53                | 0.008             | 0.760           | 0.003           | 4.84       | 3.86            | 0.000           | -60 -12 -30           | left anterior temporal lobe  |
|                   |                   |                   | 0.941           | 0.006           | 4.42       | 3.62            | 0.000           | -57 -12 -21           | left anterior temporal lobe  |
| 0.003             | 114               | 0.000             | 0.909           | 0.005           | 4.53       | 3.68            | 0.000           | 57 -63 30             | right anterior temporal lobe |
|                   |                   |                   | 0.943           | 0.006           | 4.42       | 3.62            | 0.000           | 63 -54 24             | right anterior temporal lobe |
|                   |                   |                   | 0.957           | 0.007           | 4.36       | 3.59            | 0.000           | 63 -45 21             | right anterior temporal lobe |
| 0.433             | 25                | 0.054             | 0.909           | 0.005           | 4.53       | 3.68            | 0.000           | 6 -96 30right V3/BA19 |                              |
|                   |                   |                   | 0.991           | 0.010           | 4.10       | 3.43            | 0.000           | 15 -96 24             | right V3/BA19                |

Voxels correlating with expected reward predicted by the working memory model at a threshold of  $p < 0.001$  uncorrected, cluster threshold 10 voxels. Abbreviations: PCC, posterior cingulate cortex; PHG, parahippocampal gyrus; vmPFC, ventromedial prefrontal cortex; MTG, middle temporal gyrus; V3, visual area 3. For column headings see table 1a.

**Table S2a. Voxels Correlating with Decision Entropy for the Bayesian Model**

| cluster<br>p(cor) | cluster<br>equivk | cluster<br>p(unc) | voxel<br>p(FWE) | voxel<br>p(FDR) | voxel<br>T | voxel<br>equivZ | voxel<br>p(unc) | x,y,z {mm}                         |
|-------------------|-------------------|-------------------|-----------------|-----------------|------------|-----------------|-----------------|------------------------------------|
| 0.000             | 216               | 0.000             | 0.131           | 0.020           | 6.26       | 4.56            | 0.000           | 3 0 57* SMA                        |
|                   |                   |                   | 0.841           | 0.021           | 4.70       | 3.78            | 0.000           | -6 12 48* SMA                      |
|                   |                   |                   | 0.999           | 0.036           | 3.82       | 3.25            | 0.001           | -6 18 39* SMA                      |
| 0.025             | 73                | 0.002             | 0.170           | 0.020           | 6.09       | 4.48            | 0.000           | -12 9 -3*left striatum             |
|                   |                   |                   | 0.780           | 0.020           | 4.82       | 3.85            | 0.000           | -12 6 -12* left striatum           |
| 0.007             | 96                | 0.001             | 0.207           | 0.020           | 5.95       | 4.42            | 0.000           | 51 6 30 right DLPFC                |
|                   |                   |                   | 0.959           | 0.024           | 4.36       | 3.59            | 0.000           | 63 12 30 right DLPFC               |
| 0.000             | 332               | 0.000             | 0.263           | 0.020           | 5.79       | 4.34            | 0.000           | -39 6 24 left DLPFC                |
|                   |                   |                   | 0.466           | 0.020           | 5.35       | 4.13            | 0.000           | -36 12 30 left DLPFC               |
|                   |                   |                   | 0.554           | 0.020           | 5.20       | 4.05            | 0.000           | -48 6 27 left DLPFC                |
| 0.000             | 196               | 0.000             | 0.313           | 0.020           | 5.66       | 4.28            | 0.000           | -24 -6 66left PMC                  |
|                   |                   |                   | 0.358           | 0.020           | 5.56       | 4.23            | 0.000           | -30 -3 51left PMC                  |
|                   |                   |                   | 0.742           | 0.020           | 4.89       | 3.89            | 0.000           | -36 3 54 left PMC                  |
| 0.008             | 94                | 0.001             | 0.343           | 0.020           | 5.59       | 4.25            | 0.000           | 36 27 3 right anterior insula      |
| 0.077             | 53                | 0.007             | 0.537           | 0.020           | 5.23       | 4.07            | 0.000           | 27 -63 54 right anterior insula    |
| 0.104             | 48                | 0.010             | 0.559           | 0.020           | 5.19       | 4.05            | 0.000           | 0 -21 3 MD thalamus                |
|                   |                   |                   | 0.882           | 0.022           | 4.61       | 3.73            | 0.000           | -9 -21 6 MD thalamus               |
| 0.007             | 97                | 0.001             | 0.738           | 0.020           | 4.89       | 3.89            | 0.000           | -45 -42 45 left IPL                |
|                   |                   |                   | 0.952           | 0.024           | 4.40       | 3.61            | 0.000           | -39 -48 48 left IPL                |
| 0.006             | 99                | 0.001             | 0.815           | 0.021           | 4.76       | 3.81            | 0.000           | 45 -36 42 right IPL                |
|                   |                   |                   | 0.860           | 0.021           | 4.66       | 3.76            | 0.000           | 54 -21 45 right IPL                |
|                   |                   |                   | 0.948           | 0.024           | 4.41       | 3.62            | 0.000           | 45 -45 42 right IPL                |
| 0.231             | 35                | 0.024             | 0.882           | 0.022           | 4.61       | 3.73            | 0.000           | 39 -3 63right PMC                  |
|                   |                   |                   | 0.999           | 0.034           | 3.90       | 3.30            | 0.000           | 39 0 54 right PMC                  |
| 0.296             | 31                | 0.032             | 0.978           | 0.025           | 4.25       | 3.52            | 0.000           | -63 -45 15 superior temporal gyrus |
|                   |                   |                   | 0.980           | 0.025           | 4.24       | 3.51            | 0.000           | -54 -48 3superior temporal gyrus   |

Voxels correlating with decision entropy predicted by the Bayesian model at a threshold of  $p < 0.001$  uncorrected, cluster threshold 20 voxels. Abbreviations: SMA, supplementary motor area; DLPFC, dorsolateral prefrontal cortex; PMC, premotor cortex; MD, medial dorsal; IPL inferior parietal lobule; SPL, superior parietal lobule. For column headings see table 1a.

**Table S2b. Voxels Correlating with Decision Entropy for the Q-Learning Model**

| cluster<br>p(cor) | cluster<br>equivk | cluster<br>p(unc) | voxel<br>p(FWE) | voxel<br>p(FDR) | voxel<br>T | voxel<br>equivZ | voxel<br>p(unc) | x,y,z {mm} | region                |
|-------------------|-------------------|-------------------|-----------------|-----------------|------------|-----------------|-----------------|------------|-----------------------|
| 0.000             | 184               | 0.000             | 0.107           | 0.044           | 6.45       | 4.64            | 0.000           | -48 24 3   | left IFG              |
|                   |                   |                   | 0.490           | 0.044           | 5.36       | 4.13            | 0.000           | -33 21 -9  | left IFG              |
|                   |                   |                   | 0.554           | 0.044           | 5.25       | 4.08            | 0.000           | -30 27 3   | left IFG              |
| 0.003             | 109               | 0.000             | 0.120           | 0.044           | 6.37       | 4.61            | 0.000           | 39 21 -6   | right anterior insula |
|                   |                   |                   | 0.336           | 0.044           | 5.66       | 4.28            | 0.000           | 30 12 -9   | right anterior insula |
| 0.000             | 182               | 0.000             | 0.466           | 0.044           | 5.40       | 4.16            | 0.000           | -33 -57 48 | left IPL/STG          |
|                   |                   |                   | 0.906           | 0.053           | 4.60       | 3.73            | 0.000           | -21 -63 45 | left IPL/STG          |
|                   |                   |                   | 0.925           | 0.053           | 4.54       | 3.69            | 0.000           | -45 -51 15 | left IPL/STG          |
| 0.478             | 22                | 0.055             | 0.521           | 0.044           | 5.31       | 4.11            | 0.000           | -15 12 66  | left SFG              |
|                   |                   |                   | 0.997           | 0.073           | 4.04       | 3.39            | 0.000           | -21 9 60   | left SFG              |
| 0.063             | 53                | 0.005             | 0.623           | 0.046           | 5.14       | 4.02            | 0.000           | -33 -6 42  | PFC/white matter      |
|                   |                   |                   | 0.915           | 0.053           | 4.58       | 3.71            | 0.000           | -30 -24 45 | PFC/white matter      |
|                   |                   |                   | 1.000           | 0.081           | 3.82       | 3.25            | 0.001           | -30 -18 57 | PFC/white matter      |
| 0.540             | 20                | 0.066             | 0.799           | 0.046           | 4.84       | 3.86            | 0.000           | 15 6 -12   | right putamen         |

Voxels correlating with decision entropy predicted by the Q-learning model at a threshold of  $p < 0.001$  uncorrected, cluster threshold 20 voxels. Abbreviations: STG, superior temporal gyrus; IPL, inferior parietal lobule; IFG, inferior frontal gyrus; SFG, superior frontal gyrus. For column headings see table 1a.

**Table S2c. Voxels Correlating with Decision Entropy for the Working Memory Model**

STATISTICS: p-values adjusted for search volume

| cluster<br>p(cor) | cluster<br>equivk | cluster<br>p(unc) | voxel<br>p(FWE) | voxel<br>p(FDR) | voxel<br>T | voxel<br>equivZ | voxel<br>p(unc) | x,y,z {mm} | region                |
|-------------------|-------------------|-------------------|-----------------|-----------------|------------|-----------------|-----------------|------------|-----------------------|
| 0.000             | 2954              | 0.000             | 0.000           | 0.000           | 15.09      | 6.91            | 0.000           | 24 -69 54  | right SPL             |
|                   |                   |                   | 0.000           | 0.000           | 10.00      | 5.84            | 0.000           | -21 -69 54 | left SPL              |
|                   |                   |                   | 0.000           | 0.000           | 9.71       | 5.76            | 0.000           | -39 -45 54 | left IPL              |
| 0.000             | 597               | 0.000             | 0.000           | 0.000           | 10.29      | 5.91            | 0.000           | 36 -90 3   | right occipital gyrus |
|                   |                   |                   | 0.001           | 0.000           | 8.85       | 5.51            | 0.000           | 36 -90 -12 | right occipital gyrus |
|                   |                   |                   | 0.019           | 0.000           | 7.33       | 4.99            | 0.000           | 15 -96 -6  | right V1              |
| 0.002             | 122               | 0.000             | 0.000           | 0.000           | 9.37       | 5.66            | 0.000           | 36 18 3    | right anterior insula |
| 0.000             | 789               | 0.000             | 0.002           | 0.000           | 8.51       | 5.40            | 0.000           | -42 6 27   | left IFG              |
|                   |                   |                   | 0.011           | 0.000           | 7.61       | 5.09            | 0.000           | -45 30 36  | left IFG              |
|                   |                   |                   | 0.166           | 0.000           | 6.09       | 4.48            | 0.000           | -33 27 0   | left anterior insula  |
| 0.000             | 414               | 0.000             | 0.004           | 0.000           | 8.18       | 5.29            | 0.000           | -21 6 69   | left PMC              |
|                   |                   |                   | 0.008           | 0.000           | 7.77       | 5.15            | 0.000           | -30 -3 54  | left PMC              |
|                   |                   |                   | 0.019           | 0.000           | 7.33       | 4.99            | 0.000           | -30 3 60   | left PMC              |
| 0.000             | 453               | 0.000             | 0.007           | 0.000           | 7.84       | 5.18            | 0.000           | 51 6 36    | right DLPFC (BA 9)    |
|                   |                   |                   | 0.008           | 0.000           | 7.78       | 5.16            | 0.000           | 51 30 36   | right DLPFC (BA 9)    |
|                   |                   |                   | 0.238           | 0.000           | 5.84       | 4.37            | 0.000           | 51 39 24   | right DLPFC (BA 9)    |
| 0.000             | 222               | 0.000             | 0.020           | 0.000           | 7.30       | 4.98            | 0.000           | -3 24 42   | pre-SMA               |
|                   |                   |                   | 0.026           | 0.000           | 7.17       | 4.93            | 0.000           | 6 15 48    | pre-SMA               |
| 0.005             | 105               | 0.000             | 0.490           | 0.001           | 5.30       | 4.10            | 0.000           | 30 -3 63   | right PMC             |
|                   |                   |                   | 0.654           | 0.001           | 5.02       | 3.96            | 0.000           | 30 -6 54   | right PMC             |
| 0.304             | 31                | 0.034             | 0.689           | 0.001           | 4.96       | 3.93            | 0.000           | 3 -78 -24  | cerebellum            |
| 0.068             | 56                | 0.007             | 0.941           | 0.003           | 4.42       | 3.62            | 0.000           | 48 45 -18  | right OFC             |
|                   |                   |                   | 0.991           | 0.004           | 4.11       | 3.44            | 0.000           | 39 54 -15  | right OFC             |
|                   |                   |                   | 0.993           | 0.005           | 4.07       | 3.41            | 0.000           | 42 48 0    | right OFC             |
| 0.486             | 23                | 0.063             | 0.993           | 0.005           | 4.08       | 3.41            | 0.000           | -42 54 -15 | left OFC              |
|                   |                   |                   | 0.999           | 0.007           | 3.86       | 3.28            | 0.001           | -39 51 -6  | left OFC              |

Voxels correlating with decision entropy predicted by the working memory model at a threshold of  $p < 0.001$  uncorrected, cluster threshold 20 voxels. Abbreviations: SPL, superior parietal lobule; IPL, inferior parietal lobule; IFG, inferior frontal gyrus; pre-SMA, pre-supplementary motor area; DLPFC, dorsolateral prefrontal cortex; PMC, premotor cortex; MD, medial dorsal; OFC orbitofrontal cortex. For column headings see table 1a.



**Table S3a. Voxels Correlating with the Interaction between Decision Entropy for the Bayesian Model and Log-Volatility**

STATISTICS: p-values adjusted for search volume

| cluster<br>p(cor) | cluster<br>equivk | cluster<br>p(unc) | voxel<br>p(FWE) | voxel<br>p(FDR) | voxel<br>T | voxel<br>equivZ | voxel<br>p(unc) | x,y,z {mm} | Region       |
|-------------------|-------------------|-------------------|-----------------|-----------------|------------|-----------------|-----------------|------------|--------------|
| 0.000             | 316               | 0.000             | 0.017           | 0.004           | 7.40       | 5.02            | 0.000           | 0 9 60     | pre-SMA/ACC  |
|                   |                   |                   | 0.158           | 0.008           | 6.15       | 4.51            | 0.000           | 6 -6 57    | pre-SMA/ACC  |
|                   |                   |                   | 0.911           | 0.042           | 4.54       | 3.69            | 0.000           | 3 21 33    | pre-SMA/ACC  |
| 0.031             | 68                | 0.003             | 0.264           | 0.011           | 5.79       | 4.34            | 0.000           | -21 9 -9   | left putamen |
| 0.005             | 103               | 0.000             | 0.472           | 0.017           | 5.35       | 4.13            | 0.000           | 27 -6 63   | right PMC    |
|                   |                   |                   | 0.938           | 0.045           | 4.46       | 3.64            | 0.000           | 39 -6 57   | right PMC    |
|                   |                   |                   | 0.985           | 0.058           | 4.20       | 3.49            | 0.000           | 39 -3 48   | right PMC    |
| 0.079             | 52                | 0.008             | 0.558           | 0.019           | 5.20       | 4.05            | 0.000           | -24 0 57   | left PMC     |
|                   |                   |                   | 0.819           | 0.032           | 4.75       | 3.81            | 0.000           | -24 -3 66  | left PMC     |
|                   |                   |                   | 0.984           | 0.058           | 4.21       | 3.49            | 0.000           | -36 -3 54  | left PMC     |
| 0.474             | 23                | 0.059             | 0.651           | 0.022           | 5.05       | 3.97            | 0.000           | 9 -12 12   | MD thalamus  |
|                   |                   |                   | 0.963           | 0.049           | 4.35       | 3.58            | 0.000           | 3 -24 3    | MD thalamus  |
| 0.373             | 27                | 0.043             | 0.995           | 0.066           | 4.05       | 3.40            | 0.000           | 42 -36 51  | IPL          |

Voxels correlating with the interaction between decision entropy for the Bayesian model and log-volatility. Abbreviations: pre-SMA, pre-supplementary motor area; ACC, anterior cingulate cortex; PMC, premotor cortex; MD, medial dorsal. For column headings see table 1a.

**Table S3b. Voxels Correlating with the Interaction between Decision Entropy for the Q-Learning Model and Log-Volatility**

| cluster<br>p(cor) | cluster<br>equivk | cluster<br>p(unc) | voxel<br>p(FWE) | voxel<br>p(FDR) | voxel<br>T | voxel<br>equivZ | voxel<br>p(unc) | x,y,z {mm} | region |
|-------------------|-------------------|-------------------|-----------------|-----------------|------------|-----------------|-----------------|------------|--------|
| None > 20 voxels  |                   |                   |                 |                 |            |                 |                 |            |        |

Voxels correlating with the interaction between decision entropy for the Q-learning model and log-volatility at a threshold of  $p < 0.001$  uncorrected, cluster threshold 20 voxels. For column headings see table 1a.

**Table S3c. Voxels Correlating with the Interaction between Decision Entropy for the Working Memory Model and Log-Volatility**

| cluster<br>p(cor) | cluster<br>equivk | cluster<br>p(unc) | voxel<br>p(FWE) | voxel<br>p(FDR) | voxel<br>T | voxel<br>equivZ | voxel<br>p(unc) | x,y,z {mm} | region |
|-------------------|-------------------|-------------------|-----------------|-----------------|------------|-----------------|-----------------|------------|--------|
| None > 20 voxels  |                   |                   |                 |                 |            |                 |                 |            |        |

Voxels correlating with the interaction between decision entropy for the working memory model and log-volatility at a threshold of  $p < 0.001$  uncorrected, cluster threshold 20 voxels. For column headings see table 1a.

**Table S4. Voxels Responding to the Interaction between Angular Update, Estimated Variance, and Volatility**

STATISTICS: p-values adjusted for search volume

| cluster<br>p(cor) | cluster<br>equivk | cluster<br>p(unc) | voxel<br>p(FWE) | voxel<br>p(FDR) | voxel<br>T | voxel<br>equivZ | voxel<br>p(unc) | x,y,z {mm} | region              |
|-------------------|-------------------|-------------------|-----------------|-----------------|------------|-----------------|-----------------|------------|---------------------|
| 0.000             | 180               | 0.000             | 0.182           | 0.066           | 6.03       | 4.45            | 0.000           | 3 -30 27   | PCC                 |
|                   |                   |                   | 0.844           | 0.107           | 4.68       | 3.77            | 0.000           | 12 -39 42  | PCC                 |
|                   |                   |                   | 0.965           | 0.121           | 4.32       | 3.56            | 0.000           | -6 -42 27  | PCC                 |
| 0.031             | 70                | 0.003             | 0.638           | 0.091           | 5.05       | 3.97            | 0.000           | 12 -54 9   | retrosplenia cortex |
|                   |                   |                   | 0.855           | 0.107           | 4.66       | 3.76            | 0.000           | 18 -60 21  | retrosplenia cortex |
|                   |                   |                   | 0.951           | 0.115           | 4.39       | 3.60            | 0.000           | 18 -48 3   | retrosplenia cortex |
| 0.574             | 20                | 0.081             | 0.735           | 0.093           | 4.89       | 3.88            | 0.000           | 48 -33 3   | STG                 |
| 0.460             | 24                | 0.058             | 0.806           | 0.097           | 4.76       | 3.81            | 0.000           | -15 -48 6  |                     |

Voxels responding to the interaction between angular update, estimated variance, and volatility at a threshold of  $p < 0.001$  uncorrected, cluster threshold 20 voxels. Abbreviations: PCC, posterior cingulate cortex; STG, superior temporal gyrus.
